# Supplementary material for: Energy efficiency in transient surface runoff and sediment fluxes on hillslopes – a concept to quantify the effectiveness of extreme events
Source: Copernicus journal article supplement (doi:10.5194/egusphere-2022-1301), 2023-01-02
Supplement: Supplementary file [file egusphere-2022-1301-AC1-supplement.pdf]

## Efficiency of flow

The Manning coefficient, which currently is for most applications the only way to pinpoint efficiency of free energy conversion that scales dissipation. Any parameter which characterizes roughness is ultimately related to the conversion process of free energy to heat, describing the capacity of the system to create flow from a gradient of free energy. In fact, expressing this in steady state as the flux of kinetic energy  $J_f^{ke}$  over stream power  $P$ :

$$E_Q = \frac{J_f^{ke}}{P} = \frac{\frac{1}{2}\rho Qv^2}{\rho gSQ} = \frac{v^2}{2gS}$$

with a formula that links average flow velocity and driving gradient such as the Manning equation:

$$S = \left(\frac{vn}{R^{\frac{2}{3}}}\right)^2$$

$E_Q$  becomes:

$$E_Q = \frac{R^{\frac{4}{9}}}{2gn^2}$$

The efficiency of a system to convert a gradient of free energy into kinetic energy is therefore expressed as a function of geometry (hydraulic radius) and roughness.
